# Supplementary material for: Macrophage Mannose Receptor CD206 Predicts Prognosis in Community-acquired Pneumonia
Source: PubMed Central journal article supplement (PMC6904766; doi:10.1038/s41598-019-55289-2), 2019-12-10
Supplement: 41598_2019_55289_MOESM1_ESM.pdf [file 41598_2019_55289_MOESM1_ESM.pdf]

1 **Macrophage Mannose Receptor CD206 Predicts Prognosis in Community-acquired Pneumonia**

2 Tsuchiya Kazuo, M.D.<sup>1\*</sup>, Yuzo Suzuki, M.D., Ph.D.<sup>1\*#</sup>, Katsuhiro Yoshimura, M.D.<sup>1</sup>, Hideki Yasui, M.D., Ph.D.<sup>1</sup>, Masato Karayama, M.D.,  
3 Ph.D.<sup>1</sup>, Hironao Hozumi, M.D., Ph.D.<sup>1</sup>, Kazuki Furuhashi, M.D., Ph.D.<sup>1</sup>, Noriyuki Enomoto, M.D., Ph.D.<sup>1</sup>, Tomoyuki Fujisawa, M.D., Ph.D.<sup>1</sup>,  
4 Yutaro Nakamura, M.D., Ph.D.<sup>1</sup>, Naoki Inui, M.D., Ph.D.<sup>1</sup>, Koushi Yokomura, M.D., Ph.D.<sup>2</sup>, Takafumi Suda, M.D., Ph.D.<sup>1</sup>

5

6 <sup>1</sup>Second Division, Department of Internal Medicine, Hamamatsu University School of Medicine, Hamamatsu, Japan

7 <sup>2</sup> Department of Respiratory Medicine, Seirei Mikatahara Hospital, Hamamatsu, Japan

8 \* These authors contributed equally to this work

9 #**Corresponding author:** Yuzo Suzuki, M.D., Ph.D.

10

11 **Supplement Results**

12 The following pathogens were detected: *Streptococcus pneumoniae* (n = 40; sputum culture = 31, blood culture = 10), *Staphylococcus aureus* (n  
13 = 18; sputum culture = 15, blood culture = 3), *Haemophilus influenzae* (n = 15; sputum culture), *Pseudomonas aeruginosa* (n = 11; sputum  
14 culture = 9, blood culture = 2), *Klebsiella pneumonia* (n = 5; sputum culture), *Mycoplasma pneumonia* (n = 2), *Legionella* spp. (n = 1),  
15 *Moraxella catarrhalis* (n = 1; sputum culture), *Escherichia coli* (n = 1; sputum culture), *Acinetobacter baumannii* (n = 1; sputum culture), and an  
16 unidentified gram-negative bacillus (n = 3; sputum culture) (Supplement Table 1).

17

18 **Supplemental Fig 1. Immunohistochemical staining of CD206 in 69-year-old female autopsy case with community-acquired pneumonia.**

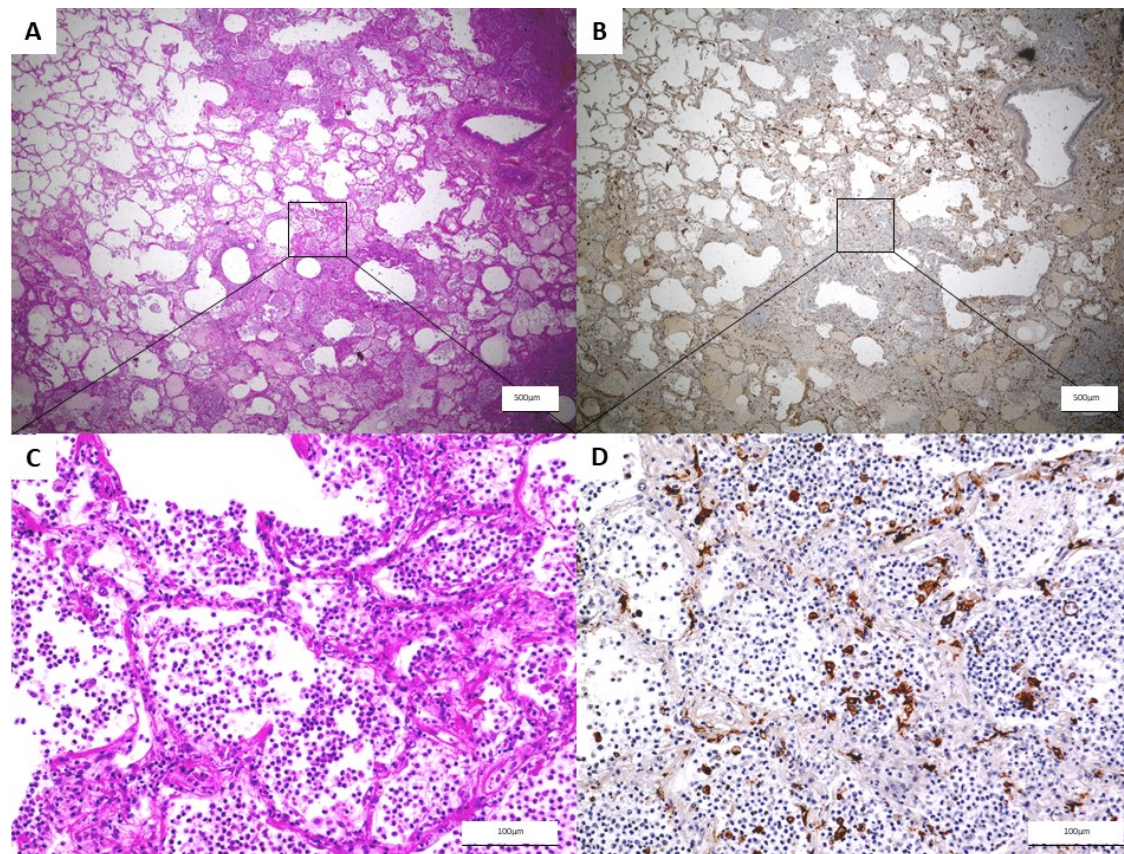

19 69-year-old female autopsy case, who was dead in two days from onset of pneumonia. (A:  $\times 20$ , C:  $\times 200$ ) HE stain shows marked inflammatory  
20 cell infiltration and macrophages in alveolar. (B:  $\times 20$ , D:  $\times 200$ ) CD206 positive macrophages were observed in immunohistochemical staining.

21 **Supplemental Fig 2. Immunohistochemical staining of CD206 in 63-year-old male autopsy case with community-acquired pneumonia.**

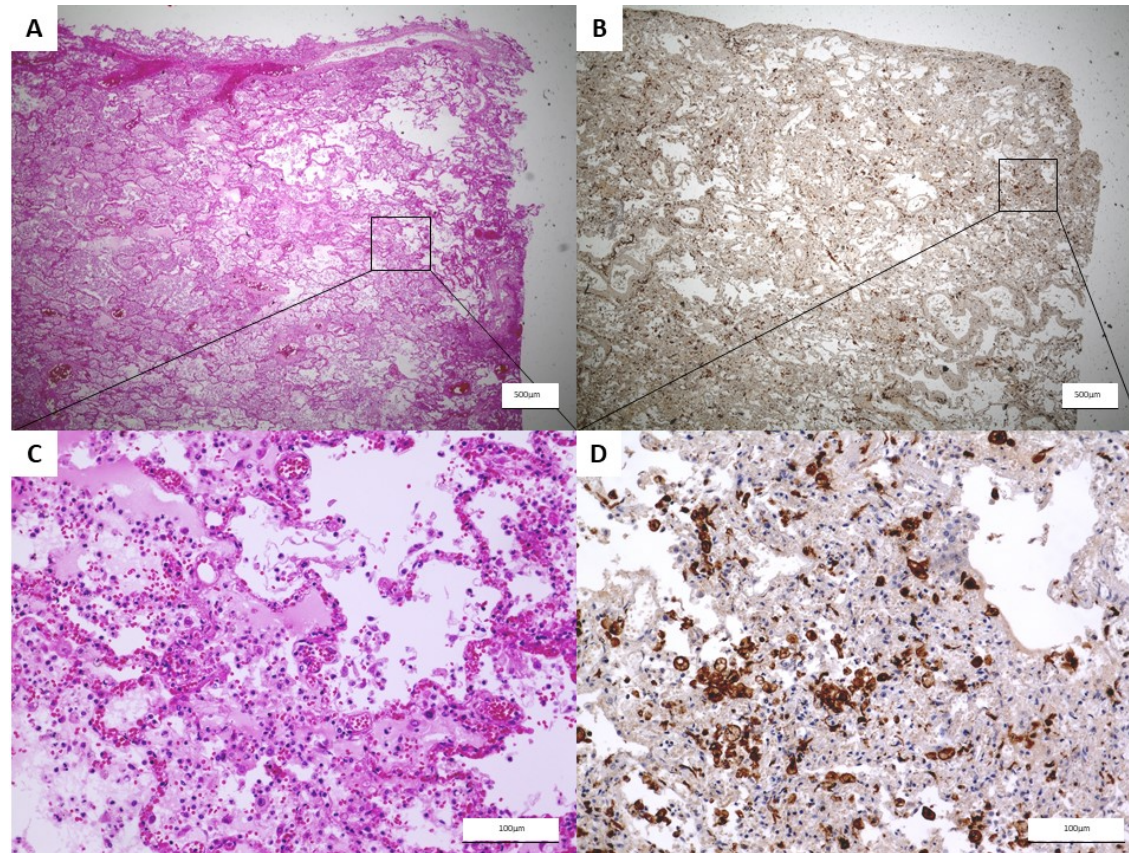

22 63-year-old male autopsy case, who was dead in five days from onset of pneumonia.

23 (A:  $\times 20$ , C:  $\times 200$ ) HE stain shows macrophage infiltration, pulmonary congestion, and deposition of fibrin in the alveolar. (B:  $\times 20$ , D:  $\times 200$ )

24 CD206 positive macrophages were strongly observed in immunohistochemical staining.

25 **Supplemental Fig 3. Immunohistochemical staining of CD206 in 55-year-old female case with early lung cancer.**

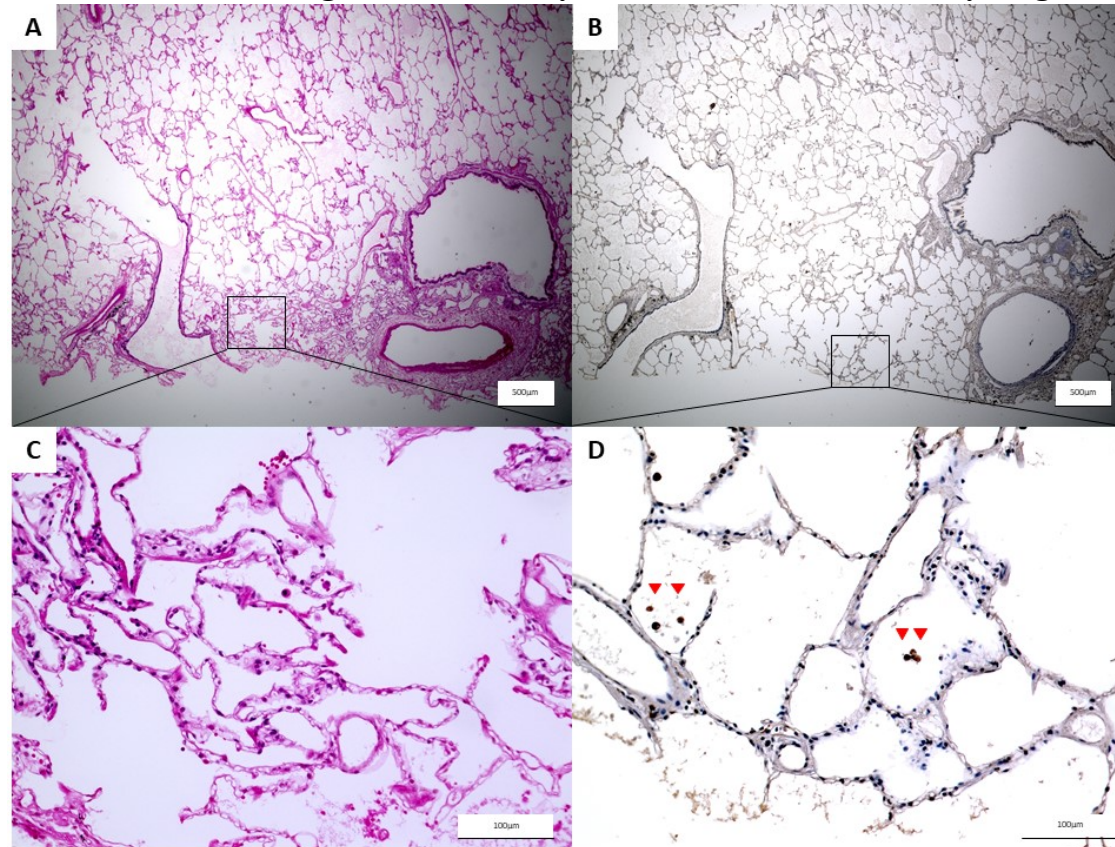

26

27 Lung section from a patient with early lung cancer, who was underwent partial resection.

28 (A:  $\times 20$ , C:  $\times 200$ ) HE stain shows macrophages in the alveolar spaces. (B:  $\times 20$ , D:  $\times 200$ ) CD206 positive macrophages (arrow head) were

29 observed in immunohistochemical staining.

30

31 **Supplemental Table1. Bacterial pathogen in community acquired pneumonia**

|                                        | Cohort1 (n=127) | Cohort2 (n=125) | p-value |
|----------------------------------------|-----------------|-----------------|---------|
| <i>Streptococcus pneumoniae</i>        | 24 (6)          | 16 (4)          | 0.228   |
| <i>Staphylococcus aureus</i>           | 10 (1)          | 8 (2)           | 0.796   |
| <i>Hemophilus influenzae</i>           | 7               | 8               | 0.808   |
| <i>Pseudomonas aeruginosa</i>          | 5 (1)           | 6 (1)           | 0.768   |
| <i>Klebsiella pneumoniae</i>           | 3               | 2               | 1.000   |
| <i>Mycoplasma pneumoniae</i>           | 2               | —               | 0.498   |
| <i>Legionella spp.</i>                 | —               | 1               | 0.496   |
| <i>Moraxella catarrhalis</i>           | —               | 1               | 0.496   |
| others                                 | 9               | 8               | 1.000   |
| unknown (normal flora or not cultured) | 68              | 75              | 0.312   |

32 Bacterial pathogens were detected from sputum culture and/or blood culture. The number shows positive sputum culture in the supplemental  
33 table1. The number in round bracket shows positive blood culture.

34 **Supplemental Table2. Correlation between the soluble CD206 and clinical parameters in patients with community-acquired pneumonia**

|                                  | Cohort 1 |                 | Cohort 2 |                 | Cohort 1 + Cohort 2 |                 |
|----------------------------------|----------|-----------------|----------|-----------------|---------------------|-----------------|
|                                  | R        | <i>p</i> -value | R        | <i>p</i> -value | R                   | <i>p</i> -value |
| Age                              | 0.3541   | <0.001          | 0.06337  | 0.4827          | 0.2514              | <0.0001         |
| P/F ratio, mmHg                  | -0.1895  | 0.0425          | -0.3253  | 0.0003          | -0.3072             | <0.0001         |
| TP, g/dl                         | -0.1406  | 0.1178          | -0.2540  | 0.0046          | -0.2343             | 0.0002          |
| Alb, g/dl                        | -0.3956  | <0.0001         | -0.4324  | <0.0001         | -0.4721             | <0.0001         |
| BUN, mg/dl                       | 0.3164   | 0.0003          | 0.2327   | 0.0090          | 0.3055              | <0.0001         |
| Cre, mg/d                        | 0.07897  | 0.3775          | 0.1325   | 0.1406          | 0.1730              | 0.0059          |
| CRP, mg/dl                       | 0.2401   | 0.0066          | 0.2304   | 0.0097          | 0.2412              | 0.0001          |
| PCT, ng/ml                       | ND       | ND              | 0.3159   | 0.0048          | 0.3159              | 0.0048          |
| WBC, / $\mu$ l                   | 0.2320   | 0.0087          | 0.0906   | 0.3150          | 0.1482              | 0.0186          |
| Ht, %                            | -0.2024  | 0.0225          | -0.1564  | 0.0909          | 0.2036              | 0.0014          |
| Plt, x 10 <sup>4</sup> / $\mu$ l | 0.0084   | 0.3506          | -0.0537  | 0.5522          | 0.0146              | 0.8183          |
| PSI (score)                      | 0.4369   | <0.0001         | 0.2802   | 0.0015          | 0.4035              | <0.0001         |
| CURB65 (score)                   | 0.3386   | <0.0001         | 0.3962   | <0.0001         | 0.3516              | <0.0001         |

35 P/F ratio; ratio of partial pressure arterial oxygen and fraction of inspired oxygen (PaO<sub>2</sub>/FiO<sub>2</sub>), TP; total protein, Alb; albumin, BUN; blood urea  
36 nitrogen, Cre; creatinine, CRP; C-reactive protein, PCT; procalcitonin, WB; white blood cell count, HB; hemoglobin, Ht; hematocrit, Plt;  
37 platelets, PSI; pneumonia severity index.  
38

39 **Supplemental Table3. Receiver operator curve analysis for predicting mortality in patients with community-acquired pneumonia**  
 40 **(CAP).**

| Variable | AUC   | Sensitivity (%) | Specificity (%) | Cut -off |
|----------|-------|-----------------|-----------------|----------|
| WBC      | 0.542 | 27.3            | 89.6            | 17510    |
| PCT      | 0.637 | 66.7            | 78.6            | 6.03     |
| CRP      | 0.674 | 63.6            | 73.9            | 19.77    |
| PSI      | 0.770 | 77.3            | 73.9            | 118      |
| CURB65   | 0.747 | 77.3            | 57.0            | 1        |
| CD206    | 0.856 | 86.4            | 79.1            | 1413     |

41 WBC, white blood cell count; PCT, procalcitonin; CRP, C-reactive protein; AUC, area under the curve

42



43 **Supplemental Table4. Receiver operator curve analysis for predicting mortality in each cohort.**

| Variable | Cohort1 |       |                 |                 | Cohort2 |       |                 |                 |
|----------|---------|-------|-----------------|-----------------|---------|-------|-----------------|-----------------|
|          | Cut-off | AUC   | Sensitivity (%) | Specificity (%) | Cut-off | AUC   | Sensitivity (%) | Specificity (%) |
| WBC      | 15700   | 0.539 | 38.5            | 81.7            | 10740   | 0.541 | 66.7            | 56.0            |
| PCT      | ND      | ND    | ND              | ND              | 6.03    | 0.603 | 57.1            | 78.9            |
| CRP      | 19.77   | 0.780 | 69.2            | 78.3            | 21.94   | 0.551 | 55.6            | 79.3            |
| PSI      | 118     | 0.844 | 84.0            | 80.9            | 120     | 0.674 | 66.7            | 67.2            |
| CURB65   | 3       | 0.744 | 38.5            | 95.7            | 1       | 0.773 | 88.9            | 55.2            |
| CD206    | 1386.3  | 0.860 | 84.6            | 86.0            | 1868.5  | 0.876 | 77.8            | 87.9            |

44 WBC, white blood cell count; PCT, procalcitonin; CRP, C-reactive protein; AUC, area under the curve

45

46
